# Supplementary material for: Design and Simulation of a System-in-Package Chip for Combined Navigation
Source: MDPI journal article supplement (doi:10.3390/mi15020167), 2024-01-23
Supplement: s1 [file s1]

Frequency U3\_1V8\_G U3\_1V8\_GND (Z para - Imaginary)

|          |          |          |
|----------|----------|----------|
| 100000   | 0.036056 | -0.03285 |
| 109648   | 0.036065 | -0.02994 |
| 120226   | 0.036071 | -0.02729 |
| 131826   | 0.036078 | -0.02486 |
| 144544   | 0.036088 | -0.02265 |
| 158489   | 0.0361   | -0.02063 |
| 173780   | 0.036114 | -0.01879 |
| 190546   | 0.03613  | -0.01711 |
| 208930   | 0.036151 | -0.01557 |
| 229087   | 0.036169 | -0.01417 |
| 251189   | 0.036192 | -0.01289 |
| 275423   | 0.036219 | -0.01173 |
| 301995   | 0.036248 | -0.01067 |
| 331131   | 0.036282 | -0.0097  |
| 363078   | 0.036318 | -0.00882 |
| 398107   | 0.036359 | -0.00802 |
| 436516   | 0.036403 | -0.00729 |
| 478630   | 0.036451 | -0.00664 |
| 524807   | 0.036502 | -0.00604 |
| 575440   | 0.036556 | -0.00551 |
| 630957   | 0.036614 | -0.00503 |
| 691831   | 0.036676 | -0.00461 |
| 758578   | 0.03674  | -0.00423 |
| 831764   | 0.036808 | -0.0039  |
| 912011   | 0.03688  | -0.00362 |
| 1.00E+06 | 0.036955 | -0.00338 |
| 1.10E+06 | 0.037035 | -0.00318 |
| 1.20E+06 | 0.03712  | -0.00303 |
| 1.32E+06 | 0.037209 | -0.00293 |
| 1.45E+06 | 0.0373   | -0.00288 |
| 1.58E+06 | 0.037393 | -0.00288 |
| 1.74E+06 | 0.037482 | -0.00296 |
| 1.91E+06 | 0.037559 | -0.00311 |
| 2.09E+06 | 0.037612 | -0.00334 |
| 2.29E+06 | 0.037619 | -0.00368 |
| 2.51E+06 | 0.037552 | -0.00414 |
| 2.75E+06 | 0.037364 | -0.00472 |
| 3.02E+06 | 0.036998 | -0.00541 |
| 3.31E+06 | 0.036378 | -0.00619 |
| 3.63E+06 | 0.035427 | -0.007   |
| 3.98E+06 | 0.034081 | -0.00772 |
| 4.37E+06 | 0.032325 | -0.00818 |
| 4.79E+06 | 0.030224 | -0.00822 |
| 5.25E+06 | 0.027927 | -0.0077  |
| 5.75E+06 | 0.025636 | -0.00656 |
| 6.31E+06 | 0.023541 | -0.00486 |

|          |          |          |
|----------|----------|----------|
| 6.92E+06 | 0.02177  | -0.0027  |
| 7.59E+06 | 0.020377 | -0.00021 |
| 8.32E+06 | 0.019378 | 0.002538 |
| 9.12E+06 | 0.018794 | 0.005475 |
| 1.00E+07 | 0.01866  | 0.008536 |
| 1.04E+07 | 0.018751 | 0.009858 |
| 1.08E+07 | 0.018929 | 0.011132 |
| 1.12E+07 | 0.01919  | 0.012352 |
| 1.16E+07 | 0.019533 | 0.013514 |
| 1.20E+07 | 0.019959 | 0.014609 |
| 1.24E+07 | 0.020469 | 0.015623 |
| 1.28E+07 | 0.021061 | 0.016537 |
| 1.32E+07 | 0.021728 | 0.017327 |
| 1.36E+07 | 0.022453 | 0.017963 |
| 1.40E+07 | 0.023207 | 0.018415 |
| 1.44E+07 | 0.02394  | 0.018658 |
| 1.48E+07 | 0.024586 | 0.018683 |
| 1.52E+07 | 0.02507  | 0.018513 |
| 1.56E+07 | 0.025324 | 0.018204 |
| 1.60E+07 | 0.025308 | 0.017845 |
| 1.64E+07 | 0.025028 | 0.017531 |
| 1.68E+07 | 0.024528 | 0.017346 |
| 1.72E+07 | 0.02388  | 0.017339 |
| 1.76E+07 | 0.023157 | 0.017523 |
| 1.80E+07 | 0.022421 | 0.017886 |
| 1.84E+07 | 0.021716 | 0.018397 |
| 1.88E+07 | 0.021069 | 0.019023 |
| 1.92E+07 | 0.020489 | 0.019733 |
| 1.96E+07 | 0.019979 | 0.020498 |
| 2.00E+07 | 0.019534 | 0.021298 |
| 2.04E+07 | 0.019147 | 0.022119 |
| 2.08E+07 | 0.018806 | 0.022955 |
| 2.12E+07 | 0.018509 | 0.023784 |
| 2.16E+07 | 0.018246 | 0.02462  |
| 2.20E+07 | 0.018012 | 0.025458 |
| 2.24E+07 | 0.017807 | 0.026295 |
| 2.28E+07 | 0.017627 | 0.02713  |
| 2.32E+07 | 0.017471 | 0.02796  |
| 2.36E+07 | 0.017334 | 0.028785 |
| 2.40E+07 | 0.017216 | 0.029604 |
| 2.44E+07 | 0.017115 | 0.030415 |
| 2.48E+07 | 0.017028 | 0.031219 |
| 2.52E+07 | 0.016954 | 0.032016 |
| 2.56E+07 | 0.016891 | 0.032804 |
| 2.60E+07 | 0.016838 | 0.033585 |
| 2.64E+07 | 0.016794 | 0.034358 |
| 2.68E+07 | 0.016757 | 0.035123 |

|          |          |          |
|----------|----------|----------|
| 2.72E+07 | 0.016727 | 0.035881 |
| 2.76E+07 | 0.016702 | 0.036633 |
| 2.80E+07 | 0.016683 | 0.037378 |
| 2.84E+07 | 0.016667 | 0.038117 |
| 2.88E+07 | 0.016656 | 0.03885  |
| 2.92E+07 | 0.016647 | 0.039578 |
| 2.96E+07 | 0.016642 | 0.0403   |
| 3.00E+07 | 0.016639 | 0.041018 |
| 3.04E+07 | 0.016639 | 0.041731 |
| 3.08E+07 | 0.01664  | 0.04244  |
| 3.12E+07 | 0.016644 | 0.043146 |
| 3.16E+07 | 0.016649 | 0.043847 |
| 3.20E+07 | 0.016656 | 0.044544 |
| 3.24E+07 | 0.016664 | 0.045239 |
| 3.28E+07 | 0.016673 | 0.04593  |
| 3.32E+07 | 0.016683 | 0.046617 |
| 3.36E+07 | 0.016695 | 0.047302 |
| 3.40E+07 | 0.016707 | 0.047984 |
| 3.44E+07 | 0.01672  | 0.048663 |
| 3.48E+07 | 0.016734 | 0.04934  |
| 3.52E+07 | 0.016748 | 0.050014 |
| 3.56E+07 | 0.016763 | 0.050685 |
| 3.60E+07 | 0.016779 | 0.051355 |
| 3.64E+07 | 0.016795 | 0.052022 |
| 3.68E+07 | 0.016812 | 0.052687 |
| 3.72E+07 | 0.016829 | 0.053351 |
| 3.76E+07 | 0.016846 | 0.054012 |
| 3.80E+07 | 0.016864 | 0.054671 |
| 3.84E+07 | 0.016884 | 0.055341 |
| 3.88E+07 | 0.016901 | 0.056008 |
| 3.92E+07 | 0.01692  | 0.056663 |
| 3.96E+07 | 0.016939 | 0.057314 |
| 4.00E+07 | 0.016958 | 0.057965 |
| 4.04E+07 | 0.016978 | 0.058614 |
| 4.08E+07 | 0.016997 | 0.059261 |
| 4.12E+07 | 0.017017 | 0.059908 |
| 4.16E+07 | 0.017037 | 0.060553 |
| 4.20E+07 | 0.017057 | 0.061196 |
| 4.24E+07 | 0.017078 | 0.061839 |
| 4.28E+07 | 0.017098 | 0.06248  |
| 4.32E+07 | 0.017119 | 0.063121 |
| 4.36E+07 | 0.017139 | 0.06376  |
| 4.40E+07 | 0.01716  | 0.064399 |
| 4.44E+07 | 0.017181 | 0.065036 |
| 4.48E+07 | 0.017202 | 0.065672 |
| 4.52E+07 | 0.017223 | 0.066308 |
| 4.56E+07 | 0.017244 | 0.066942 |

|          |          |          |
|----------|----------|----------|
| 4.60E+07 | 0.017265 | 0.067576 |
| 4.64E+07 | 0.017286 | 0.068209 |
| 4.68E+07 | 0.017307 | 0.068841 |
| 4.72E+07 | 0.017328 | 0.069472 |
| 4.76E+07 | 0.017349 | 0.070102 |
| 4.80E+07 | 0.01737  | 0.070732 |
| 4.84E+07 | 0.017392 | 0.071361 |
| 4.88E+07 | 0.017413 | 0.071989 |
| 4.92E+07 | 0.017434 | 0.072616 |
| 4.96E+07 | 0.017455 | 0.073243 |
| 5.00E+07 | 0.017477 | 0.073869 |
| 5.20E+07 | 0.017582 | 0.07699  |
| 5.40E+07 | 0.017688 | 0.080097 |
| 5.60E+07 | 0.017794 | 0.083192 |
| 5.80E+07 | 0.017899 | 0.086275 |
| 6.00E+07 | 0.018004 | 0.089349 |
| 6.20E+07 | 0.018109 | 0.092414 |
| 6.40E+07 | 0.018212 | 0.095471 |
| 6.60E+07 | 0.018315 | 0.09852  |
| 6.80E+07 | 0.018417 | 0.101562 |
| 7.00E+07 | 0.018518 | 0.104598 |
| 7.20E+07 | 0.018618 | 0.107628 |
| 7.40E+07 | 0.018716 | 0.110653 |
| 7.60E+07 | 0.018814 | 0.113674 |
| 7.80E+07 | 0.018911 | 0.116689 |
| 8.00E+07 | 0.019007 | 0.119701 |
| 8.20E+07 | 0.019102 | 0.122709 |
| 8.40E+07 | 0.019196 | 0.125713 |
| 8.60E+07 | 0.019289 | 0.128714 |
| 8.80E+07 | 0.019382 | 0.131712 |
| 9.00E+07 | 0.019474 | 0.134707 |
| 9.20E+07 | 0.019564 | 0.1377   |
| 9.40E+07 | 0.019655 | 0.14069  |
| 9.60E+07 | 0.019744 | 0.143678 |
| 9.80E+07 | 0.019833 | 0.146663 |
| 1.00E+08 | 0.019921 | 0.149647 |
| 1.02E+08 | 0.020009 | 0.152629 |
| 1.04E+08 | 0.020096 | 0.155608 |
| 1.06E+08 | 0.020182 | 0.158587 |
| 1.08E+08 | 0.020268 | 0.161563 |
| 1.10E+08 | 0.020353 | 0.164538 |
| 1.12E+08 | 0.020438 | 0.167512 |
| 1.14E+08 | 0.020523 | 0.170484 |
| 1.16E+08 | 0.020607 | 0.173455 |
| 1.18E+08 | 0.02069  | 0.176425 |
| 1.20E+08 | 0.020774 | 0.179394 |
| 1.22E+08 | 0.020856 | 0.182361 |

|          |          |          |
|----------|----------|----------|
| 1.24E+08 | 0.020939 | 0.185328 |
| 1.26E+08 | 0.021021 | 0.188293 |
| 1.28E+08 | 0.021103 | 0.191258 |
| 1.30E+08 | 0.021184 | 0.194222 |
| 1.32E+08 | 0.021266 | 0.197185 |
| 1.34E+08 | 0.021346 | 0.200147 |
| 1.36E+08 | 0.021427 | 0.203108 |
| 1.38E+08 | 0.021507 | 0.206069 |
| 1.40E+08 | 0.021587 | 0.209029 |
| 1.42E+08 | 0.021667 | 0.211988 |
| 1.44E+08 | 0.021747 | 0.214947 |
| 1.46E+08 | 0.021826 | 0.217905 |
| 1.48E+08 | 0.021905 | 0.220863 |
| 1.50E+08 | 0.021984 | 0.22382  |
| 1.52E+08 | 0.022063 | 0.226776 |
| 1.54E+08 | 0.022141 | 0.229733 |
| 1.56E+08 | 0.02222  | 0.232688 |
| 1.58E+08 | 0.022298 | 0.235644 |
| 1.60E+08 | 0.022376 | 0.238599 |
| 1.62E+08 | 0.022453 | 0.241553 |
| 1.64E+08 | 0.022531 | 0.244508 |
| 1.66E+08 | 0.022608 | 0.247461 |
| 1.68E+08 | 0.022686 | 0.250415 |
| 1.70E+08 | 0.022763 | 0.253368 |
| 1.72E+08 | 0.02284  | 0.256322 |
| 1.74E+08 | 0.022917 | 0.259274 |
| 1.76E+08 | 0.022993 | 0.262227 |
| 1.78E+08 | 0.02307  | 0.26518  |
| 1.80E+08 | 0.023146 | 0.268132 |
| 1.82E+08 | 0.023223 | 0.271084 |
| 1.84E+08 | 0.023299 | 0.274036 |
| 1.86E+08 | 0.023375 | 0.276988 |
| 1.88E+08 | 0.023451 | 0.27994  |
| 1.90E+08 | 0.023526 | 0.282891 |
| 1.92E+08 | 0.023602 | 0.285843 |
| 1.94E+08 | 0.023678 | 0.288795 |
| 1.96E+08 | 0.023753 | 0.291746 |
| 1.98E+08 | 0.023829 | 0.294698 |
| 2.00E+08 | 0.023904 | 0.297649 |
| 2.02E+08 | 0.023979 | 0.3006   |
| 2.04E+08 | 0.024054 | 0.303552 |
| 2.06E+08 | 0.02413  | 0.306503 |
| 2.08E+08 | 0.024205 | 0.309455 |
| 2.10E+08 | 0.024279 | 0.312407 |
| 2.12E+08 | 0.024354 | 0.315358 |
| 2.14E+08 | 0.024429 | 0.31831  |
| 2.16E+08 | 0.024504 | 0.321262 |

|          |          |          |
|----------|----------|----------|
| 2.18E+08 | 0.024578 | 0.324214 |
| 2.20E+08 | 0.024653 | 0.327166 |
| 2.22E+08 | 0.024727 | 0.330118 |
| 2.24E+08 | 0.024802 | 0.33307  |
| 2.26E+08 | 0.024876 | 0.336023 |
| 2.28E+08 | 0.02495  | 0.338975 |
| 2.30E+08 | 0.025025 | 0.341928 |
| 2.32E+08 | 0.025099 | 0.344881 |
| 2.34E+08 | 0.025173 | 0.347834 |
| 2.36E+08 | 0.025247 | 0.350788 |
| 2.38E+08 | 0.025321 | 0.353741 |
| 2.40E+08 | 0.025395 | 0.356695 |
| 2.42E+08 | 0.025469 | 0.359649 |
| 2.44E+08 | 0.025543 | 0.362604 |
| 2.46E+08 | 0.025617 | 0.365558 |
| 2.48E+08 | 0.025691 | 0.368513 |
| 2.50E+08 | 0.025764 | 0.371468 |
| 2.52E+08 | 0.025838 | 0.374424 |
| 2.54E+08 | 0.025912 | 0.377379 |
| 2.56E+08 | 0.025985 | 0.380335 |
| 2.58E+08 | 0.026059 | 0.383292 |
| 2.60E+08 | 0.026133 | 0.386249 |
| 2.62E+08 | 0.026206 | 0.389206 |
| 2.64E+08 | 0.02628  | 0.392163 |
| 2.66E+08 | 0.026353 | 0.395121 |
| 2.68E+08 | 0.026427 | 0.398079 |
| 2.70E+08 | 0.0265   | 0.401037 |
| 2.72E+08 | 0.026574 | 0.403996 |
| 2.74E+08 | 0.026647 | 0.406956 |
| 2.76E+08 | 0.02672  | 0.409915 |
| 2.78E+08 | 0.026794 | 0.412876 |
| 2.80E+08 | 0.026867 | 0.415836 |
| 2.82E+08 | 0.02694  | 0.418797 |
| 2.84E+08 | 0.027013 | 0.421759 |
| 2.86E+08 | 0.027087 | 0.42472  |
| 2.88E+08 | 0.02716  | 0.427683 |
| 2.90E+08 | 0.027233 | 0.430646 |
| 2.92E+08 | 0.027306 | 0.433609 |
| 2.94E+08 | 0.027379 | 0.436573 |
| 2.96E+08 | 0.027452 | 0.439537 |
| 2.98E+08 | 0.027526 | 0.442502 |
| 3.00E+08 | 0.027599 | 0.445467 |
| 3.02E+08 | 0.027672 | 0.448433 |
| 3.04E+08 | 0.027745 | 0.4514   |
| 3.06E+08 | 0.027818 | 0.454367 |
| 3.08E+08 | 0.027891 | 0.457334 |
| 3.10E+08 | 0.027964 | 0.460302 |

|          |          |          |
|----------|----------|----------|
| 3.12E+08 | 0.028037 | 0.463271 |
| 3.14E+08 | 0.02811  | 0.46624  |
| 3.16E+08 | 0.028183 | 0.46921  |
| 3.18E+08 | 0.028256 | 0.472181 |
| 3.20E+08 | 0.028329 | 0.475152 |
| 3.22E+08 | 0.028401 | 0.478124 |
| 3.24E+08 | 0.028474 | 0.481096 |
| 3.26E+08 | 0.028547 | 0.484069 |
| 3.28E+08 | 0.02862  | 0.487043 |
| 3.30E+08 | 0.028693 | 0.490017 |
| 3.32E+08 | 0.028766 | 0.492992 |
| 3.34E+08 | 0.028839 | 0.495968 |
| 3.36E+08 | 0.028911 | 0.498944 |
| 3.38E+08 | 0.028984 | 0.501921 |
| 3.40E+08 | 0.029057 | 0.504899 |
| 3.42E+08 | 0.02913  | 0.507877 |
| 3.44E+08 | 0.029202 | 0.510857 |
| 3.46E+08 | 0.029275 | 0.513837 |
| 3.48E+08 | 0.029348 | 0.516817 |
| 3.50E+08 | 0.02942  | 0.519799 |
| 3.52E+08 | 0.029493 | 0.522781 |
| 3.54E+08 | 0.029566 | 0.525764 |
| 3.56E+08 | 0.029638 | 0.528748 |
| 3.58E+08 | 0.029711 | 0.531732 |
| 3.60E+08 | 0.029784 | 0.534718 |
| 3.62E+08 | 0.029856 | 0.537704 |
| 3.64E+08 | 0.029929 | 0.540691 |
| 3.66E+08 | 0.030001 | 0.543679 |
| 3.68E+08 | 0.030074 | 0.546667 |
| 3.70E+08 | 0.030146 | 0.549657 |
| 3.72E+08 | 0.030219 | 0.552647 |
| 3.74E+08 | 0.030291 | 0.555639 |
| 3.76E+08 | 0.030364 | 0.558631 |
| 3.78E+08 | 0.030436 | 0.561624 |
| 3.80E+08 | 0.030509 | 0.564618 |
| 3.82E+08 | 0.030581 | 0.567613 |
| 3.84E+08 | 0.030654 | 0.570608 |
| 3.86E+08 | 0.030726 | 0.573605 |
| 3.88E+08 | 0.030798 | 0.576603 |
| 3.90E+08 | 0.030871 | 0.579601 |
| 3.92E+08 | 0.030943 | 0.582601 |
| 3.94E+08 | 0.031015 | 0.585601 |
| 3.96E+08 | 0.031088 | 0.588603 |
| 3.98E+08 | 0.03116  | 0.591605 |
| 4.00E+08 | 0.031232 | 0.594609 |
| 4.02E+08 | 0.031305 | 0.597613 |
| 4.04E+08 | 0.031377 | 0.600619 |

|          |          |          |
|----------|----------|----------|
| 4.06E+08 | 0.031449 | 0.603626 |
| 4.08E+08 | 0.031521 | 0.606633 |
| 4.10E+08 | 0.031593 | 0.609642 |
| 4.12E+08 | 0.031665 | 0.612651 |
| 4.14E+08 | 0.031737 | 0.615662 |
| 4.16E+08 | 0.031809 | 0.618674 |
| 4.18E+08 | 0.031881 | 0.621687 |
| 4.20E+08 | 0.031953 | 0.624701 |
| 4.22E+08 | 0.032025 | 0.627716 |
| 4.24E+08 | 0.032097 | 0.630733 |
| 4.26E+08 | 0.032169 | 0.63375  |
| 4.28E+08 | 0.032241 | 0.636768 |
| 4.30E+08 | 0.032313 | 0.639788 |
| 4.32E+08 | 0.032385 | 0.642809 |
| 4.34E+08 | 0.032457 | 0.645831 |
| 4.36E+08 | 0.032528 | 0.648854 |
| 4.38E+08 | 0.0326   | 0.651879 |
| 4.40E+08 | 0.032672 | 0.654904 |
| 4.42E+08 | 0.032743 | 0.657931 |
| 4.44E+08 | 0.032815 | 0.660959 |
| 4.46E+08 | 0.032886 | 0.663988 |
| 4.48E+08 | 0.032958 | 0.667019 |
| 4.50E+08 | 0.033029 | 0.670051 |
| 4.52E+08 | 0.033101 | 0.673084 |
| 4.54E+08 | 0.033172 | 0.676118 |
| 4.56E+08 | 0.033243 | 0.679153 |
| 4.58E+08 | 0.033315 | 0.68219  |
| 4.60E+08 | 0.033386 | 0.685229 |
| 4.62E+08 | 0.033457 | 0.688268 |
| 4.64E+08 | 0.033528 | 0.691309 |
| 4.66E+08 | 0.033599 | 0.694351 |
| 4.68E+08 | 0.03367  | 0.697394 |
| 4.70E+08 | 0.033741 | 0.700439 |
| 4.72E+08 | 0.033812 | 0.703485 |
| 4.74E+08 | 0.033883 | 0.706533 |
| 4.76E+08 | 0.033954 | 0.709582 |
| 4.78E+08 | 0.034025 | 0.712632 |
| 4.80E+08 | 0.034095 | 0.715684 |
| 4.82E+08 | 0.034166 | 0.718737 |
| 4.84E+08 | 0.034237 | 0.721792 |
| 4.86E+08 | 0.034307 | 0.724848 |
| 4.88E+08 | 0.034378 | 0.727905 |
| 4.90E+08 | 0.034448 | 0.730964 |
| 4.92E+08 | 0.034519 | 0.734024 |
| 4.94E+08 | 0.034589 | 0.737086 |
| 4.96E+08 | 0.034659 | 0.74015  |
| 4.98E+08 | 0.03473  | 0.743215 |



|          |          |          |
|----------|----------|----------|
| 5.00E+08 | 0.0348   | 0.746281 |
| 5.05E+08 | 0.034976 | 0.753954 |
| 5.10E+08 | 0.035152 | 0.761636 |
| 5.15E+08 | 0.035328 | 0.769329 |
| 5.20E+08 | 0.035504 | 0.777031 |
| 5.25E+08 | 0.035681 | 0.784744 |
| 5.30E+08 | 0.035859 | 0.792468 |
| 5.35E+08 | 0.036038 | 0.800202 |
| 5.40E+08 | 0.036218 | 0.807947 |
| 5.45E+08 | 0.0364   | 0.815704 |
| 5.50E+08 | 0.036584 | 0.823472 |
| 5.55E+08 | 0.036768 | 0.831251 |
| 5.60E+08 | 0.036953 | 0.839043 |
| 5.65E+08 | 0.037138 | 0.846847 |
| 5.70E+08 | 0.037318 | 0.854662 |
| 5.75E+08 | 0.037493 | 0.862488 |
| 5.80E+08 | 0.037657 | 0.870325 |
| 5.85E+08 | 0.037812 | 0.878175 |
| 5.90E+08 | 0.037971 | 0.88604  |
| 5.95E+08 | 0.038167 | 0.893919 |
| 6.00E+08 | 0.038442 | 0.901832 |
| 6.05E+08 | 0.038522 | 0.909716 |
| 6.10E+08 | 0.0387   | 0.917635 |
| 6.15E+08 | 0.038732 | 0.926028 |
| 6.20E+08 | 0.03891  | 0.933974 |
| 6.25E+08 | 0.039088 | 0.941936 |
| 6.30E+08 | 0.039267 | 0.949912 |
| 6.35E+08 | 0.039446 | 0.957904 |
| 6.40E+08 | 0.039625 | 0.965912 |
| 6.45E+08 | 0.039805 | 0.973936 |
| 6.50E+08 | 0.039986 | 0.981975 |
| 6.55E+08 | 0.040166 | 0.990031 |
| 6.60E+08 | 0.040348 | 0.998104 |
| 6.65E+08 | 0.04053  | 1.00619  |
| 6.70E+08 | 0.040713 | 1.0143   |
| 6.75E+08 | 0.040896 | 1.02243  |
| 6.80E+08 | 0.04108  | 1.03057  |
| 6.85E+08 | 0.041264 | 1.03873  |
| 6.90E+08 | 0.04145  | 1.04691  |
| 6.95E+08 | 0.041636 | 1.05511  |
| 7.00E+08 | 0.041822 | 1.06332  |
| 7.05E+08 | 0.04201  | 1.07156  |
| 7.10E+08 | 0.042198 | 1.07981  |
| 7.15E+08 | 0.042387 | 1.08809  |
| 7.20E+08 | 0.042577 | 1.09638  |
| 7.25E+08 | 0.042768 | 1.1047   |
| 7.30E+08 | 0.04296  | 1.11304  |

|          |          |         |
|----------|----------|---------|
| 7.35E+08 | 0.043152 | 1.12139 |
| 7.40E+08 | 0.043346 | 1.12977 |
| 7.45E+08 | 0.04354  | 1.13818 |
| 7.50E+08 | 0.043736 | 1.1466  |
| 7.55E+08 | 0.043933 | 1.15505 |
| 7.60E+08 | 0.044131 | 1.16351 |
| 7.65E+08 | 0.044329 | 1.17201 |
| 7.70E+08 | 0.04453  | 1.18052 |
| 7.75E+08 | 0.044731 | 1.18906 |
| 7.80E+08 | 0.044933 | 1.19763 |
| 7.85E+08 | 0.045137 | 1.20622 |
| 7.90E+08 | 0.045342 | 1.21483 |
| 7.95E+08 | 0.045549 | 1.22347 |
| 8.00E+08 | 0.045756 | 1.23214 |
| 8.05E+08 | 0.045966 | 1.24083 |
| 8.10E+08 | 0.046176 | 1.24955 |
| 8.15E+08 | 0.046388 | 1.2583  |
| 8.20E+08 | 0.046602 | 1.26708 |
| 8.25E+08 | 0.046818 | 1.27588 |
| 8.30E+08 | 0.047034 | 1.28472 |
| 8.35E+08 | 0.047253 | 1.29358 |
| 8.40E+08 | 0.047474 | 1.30247 |
| 8.45E+08 | 0.047696 | 1.31139 |
| 8.50E+08 | 0.04792  | 1.32035 |
| 8.55E+08 | 0.048146 | 1.32933 |
| 8.60E+08 | 0.048373 | 1.33835 |
| 8.65E+08 | 0.048603 | 1.3474  |
| 8.70E+08 | 0.048835 | 1.35648 |
| 8.75E+08 | 0.049069 | 1.3656  |
| 8.80E+08 | 0.049305 | 1.37475 |
| 8.85E+08 | 0.049543 | 1.38393 |
| 8.90E+08 | 0.049784 | 1.39315 |
| 8.95E+08 | 0.050027 | 1.40241 |
| 9.00E+08 | 0.050272 | 1.4117  |
| 9.05E+08 | 0.05052  | 1.42103 |
| 9.10E+08 | 0.05077  | 1.4304  |
| 9.15E+08 | 0.051023 | 1.43981 |
| 9.20E+08 | 0.051279 | 1.44925 |
| 9.25E+08 | 0.051537 | 1.45874 |
| 9.30E+08 | 0.051798 | 1.46827 |
| 9.35E+08 | 0.052063 | 1.47784 |
| 9.40E+08 | 0.05233  | 1.48745 |
| 9.45E+08 | 0.0526   | 1.4971  |
| 9.50E+08 | 0.052873 | 1.5068  |
| 9.55E+08 | 0.053149 | 1.51654 |
| 9.60E+08 | 0.053429 | 1.52633 |
| 9.65E+08 | 0.053713 | 1.53617 |

|          |          |         |
|----------|----------|---------|
| 9.70E+08 | 0.053999 | 1.54605 |
| 9.75E+08 | 0.05429  | 1.55598 |
| 9.80E+08 | 0.054584 | 1.56596 |
| 9.85E+08 | 0.054882 | 1.57599 |
| 9.90E+08 | 0.055184 | 1.58607 |
| 9.95E+08 | 0.05549  | 1.5962  |
| 1.00E+09 | 0.055799 | 1.60638 |
| 1.01E+09 | 0.056114 | 1.61662 |
| 1.01E+09 | 0.056432 | 1.62691 |
| 1.02E+09 | 0.056755 | 1.63725 |
| 1.02E+09 | 0.057083 | 1.64765 |
| 1.03E+09 | 0.057415 | 1.65811 |
| 1.03E+09 | 0.057752 | 1.66863 |
| 1.04E+09 | 0.058094 | 1.67921 |
| 1.04E+09 | 0.058441 | 1.68985 |
| 1.05E+09 | 0.058794 | 1.70056 |
| 1.05E+09 | 0.059152 | 1.71132 |
| 1.06E+09 | 0.059516 | 1.72216 |
| 1.06E+09 | 0.059885 | 1.73306 |
| 1.07E+09 | 0.060261 | 1.74403 |
| 1.07E+09 | 0.060643 | 1.75507 |
| 1.08E+09 | 0.061032 | 1.76618 |
| 1.08E+09 | 0.061427 | 1.77736 |
| 1.09E+09 | 0.061828 | 1.78862 |
| 1.09E+09 | 0.062237 | 1.79995 |
| 1.10E+09 | 0.062653 | 1.81136 |
| 1.10E+09 | 0.063077 | 1.82285 |
| 1.11E+09 | 0.063508 | 1.83443 |
| 1.11E+09 | 0.063948 | 1.84608 |
| 1.12E+09 | 0.064395 | 1.85782 |
| 1.12E+09 | 0.064851 | 1.86965 |
| 1.13E+09 | 0.065316 | 1.88156 |
| 1.13E+09 | 0.065789 | 1.89357 |
| 1.14E+09 | 0.066273 | 1.90567 |
| 1.14E+09 | 0.066765 | 1.91786 |
| 1.15E+09 | 0.067268 | 1.93015 |
| 1.15E+09 | 0.067781 | 1.94254 |
| 1.16E+09 | 0.068304 | 1.95503 |
| 1.16E+09 | 0.068839 | 1.96763 |
| 1.17E+09 | 0.069385 | 1.98033 |
| 1.17E+09 | 0.069943 | 1.99315 |
| 1.18E+09 | 0.070513 | 2.00607 |
| 1.18E+09 | 0.071095 | 2.01911 |
| 1.19E+09 | 0.071691 | 2.03227 |
| 1.19E+09 | 0.0723   | 2.04555 |
| 1.20E+09 | 0.072923 | 2.05895 |
| 1.20E+09 | 0.07356  | 2.07248 |

|          |          |         |
|----------|----------|---------|
| 1.21E+09 | 0.074213 | 2.08614 |
| 1.21E+09 | 0.074881 | 2.09993 |
| 1.22E+09 | 0.075565 | 2.11386 |
| 1.22E+09 | 0.076266 | 2.12793 |
| 1.23E+09 | 0.076985 | 2.14215 |
| 1.23E+09 | 0.077721 | 2.15651 |
| 1.24E+09 | 0.078476 | 2.17103 |
| 1.24E+09 | 0.079251 | 2.1857  |
| 1.25E+09 | 0.080046 | 2.20053 |
| 1.25E+09 | 0.080862 | 2.21553 |
| 1.26E+09 | 0.0817   | 2.2307  |
| 1.26E+09 | 0.08256  | 2.24605 |
| 1.27E+09 | 0.083445 | 2.26157 |
| 1.27E+09 | 0.084354 | 2.27728 |
| 1.28E+09 | 0.085288 | 2.29319 |
| 1.28E+09 | 0.08625  | 2.30928 |
| 1.29E+09 | 0.087239 | 2.32558 |
| 1.29E+09 | 0.088258 | 2.34209 |
| 1.30E+09 | 0.089307 | 2.35882 |
| 1.30E+09 | 0.090387 | 2.37576 |
| 1.31E+09 | 0.091501 | 2.39293 |
| 1.31E+09 | 0.09265  | 2.41034 |
| 1.32E+09 | 0.093835 | 2.428   |
| 1.32E+09 | 0.095058 | 2.4459  |
| 1.33E+09 | 0.096321 | 2.46407 |
| 1.33E+09 | 0.097625 | 2.4825  |
| 1.34E+09 | 0.098974 | 2.50121 |
| 1.34E+09 | 0.100369 | 2.5202  |
| 1.35E+09 | 0.101812 | 2.5395  |
| 1.35E+09 | 0.103306 | 2.5591  |
| 1.36E+09 | 0.104855 | 2.57902 |
| 1.36E+09 | 0.10646  | 2.59927 |
| 1.37E+09 | 0.108126 | 2.61986 |
| 1.37E+09 | 0.109855 | 2.64081 |
| 1.38E+09 | 0.111653 | 2.66212 |
| 1.38E+09 | 0.113523 | 2.68382 |
| 1.39E+09 | 0.115471 | 2.70592 |
| 1.39E+09 | 0.117503 | 2.72843 |
| 1.40E+09 | 0.119625 | 2.75137 |
| 1.40E+09 | 0.121845 | 2.77476 |
| 1.41E+09 | 0.124172 | 2.79862 |
| 1.41E+09 | 0.126619 | 2.82297 |
| 1.42E+09 | 0.129199 | 2.84784 |
| 1.42E+09 | 0.131931 | 2.87324 |
| 1.43E+09 | 0.134838 | 2.89919 |
| 1.43E+09 | 0.137951 | 2.92573 |
| 1.44E+09 | 0.141313 | 2.95286 |

|          |          |         |
|----------|----------|---------|
| 1.44E+09 | 0.144982 | 2.98059 |
| 1.45E+09 | 0.149031 | 3.00891 |
| 1.45E+09 | 0.153551 | 3.03774 |
| 1.46E+09 | 0.158619 | 3.06694 |
| 1.46E+09 | 0.16421  | 3.0962  |
| 1.47E+09 | 0.17002  | 3.12518 |
| 1.47E+09 | 0.175323 | 3.15376 |
| 1.48E+09 | 0.179339 | 3.18258 |
| 1.48E+09 | 0.182055 | 3.21277 |
| 1.49E+09 | 0.184256 | 3.24501 |
| 1.49E+09 | 0.18672  | 3.27922 |
| 1.50E+09 | 0.189802 | 3.31506 |
| 1.50E+09 | 0.193559 | 3.35225 |
| 1.51E+09 | 0.197939 | 3.39065 |
| 1.51E+09 | 0.202878 | 3.43021 |
| 1.52E+09 | 0.208327 | 3.47094 |
| 1.52E+09 | 0.214258 | 3.51291 |
| 1.53E+09 | 0.220661 | 3.55616 |
| 1.53E+09 | 0.227539 | 3.60079 |
| 1.54E+09 | 0.234906 | 3.64686 |
| 1.54E+09 | 0.242785 | 3.69447 |
| 1.55E+09 | 0.251204 | 3.74372 |
| 1.55E+09 | 0.260201 | 3.79472 |
| 1.56E+09 | 0.269818 | 3.84757 |
| 1.56E+09 | 0.280105 | 3.90239 |
| 1.57E+09 | 0.291119 | 3.95933 |
| 1.57E+09 | 0.302924 | 4.01851 |
| 1.58E+09 | 0.315591 | 4.0801  |
| 1.58E+09 | 0.329204 | 4.14426 |
| 1.59E+09 | 0.343854 | 4.21117 |
| 1.59E+09 | 0.359646 | 4.28103 |
| 1.60E+09 | 0.376698 | 4.35406 |
| 1.60E+09 | 0.395144 | 4.43051 |
| 1.61E+09 | 0.415137 | 4.51062 |
| 1.61E+09 | 0.43685  | 4.5947  |
| 1.62E+09 | 0.460484 | 4.68307 |
| 1.62E+09 | 0.486267 | 4.77606 |
| 1.63E+09 | 0.514463 | 4.87409 |
| 1.63E+09 | 0.545375 | 4.97758 |
| 1.64E+09 | 0.579359 | 5.08702 |
| 1.64E+09 | 0.616827 | 5.20295 |
| 1.65E+09 | 0.658263 | 5.32597 |
| 1.65E+09 | 0.704234 | 5.45678 |
| 1.66E+09 | 0.755414 | 5.59612 |
| 1.66E+09 | 0.812603 | 5.74486 |
| 1.67E+09 | 0.876757 | 5.90396 |
| 1.67E+09 | 0.949026 | 6.07452 |

|          |         |          |
|----------|---------|----------|
| 1.68E+09 | 1.0308  | 6.25778  |
| 1.68E+09 | 1.12378 | 6.45512  |
| 1.69E+09 | 1.23004 | 6.66812  |
| 1.69E+09 | 1.35215 | 6.89856  |
| 1.70E+09 | 1.49331 | 7.14841  |
| 1.70E+09 | 1.65753 | 7.41989  |
| 1.71E+09 | 1.84991 | 7.7154   |
| 1.71E+09 | 2.07693 | 8.03752  |
| 1.72E+09 | 2.34695 | 8.38888  |
| 1.72E+09 | 2.67082 | 8.77191  |
| 1.73E+09 | 3.06272 | 9.18844  |
| 1.73E+09 | 3.5413  | 9.6389   |
| 1.74E+09 | 4.13119 | 10.1208  |
| 1.74E+09 | 4.86475 | 10.6262  |
| 1.75E+09 | 5.78396 | 11.137   |
| 1.75E+09 | 6.94149 | 11.6171  |
| 1.76E+09 | 8.39842 | 11.9994  |
| 1.76E+09 | 10.213  | 12.1663  |
| 1.77E+09 | 12.4092 | 11.9283  |
| 1.77E+09 | 14.9099 | 11.0168  |
| 1.78E+09 | 17.4372 | 9.14349  |
| 1.78E+09 | 19.4557 | 6.18336  |
| 1.79E+09 | 20.3285 | 2.42694  |
| 1.79E+09 | 19.7256 | -1.39653 |
| 1.80E+09 | 17.8981 | -4.52137 |
| 1.80E+09 | 15.461  | -6.58587 |
| 1.81E+09 | 12.9751 | -7.66509 |
| 1.81E+09 | 10.7531 | -8.03145 |
| 1.82E+09 | 8.89663 | -7.9565  |
| 1.82E+09 | 7.39488 | -7.63881 |
| 1.83E+09 | 6.19524 | -7.20401 |
| 1.83E+09 | 5.23854 | -6.72536 |
| 1.84E+09 | 4.47236 | -6.24318 |
| 1.84E+09 | 3.8543  | -5.77834 |
| 1.85E+09 | 3.35141 | -5.34068 |
| 1.85E+09 | 2.93848 | -4.9339  |
| 1.86E+09 | 2.59632 | -4.55844 |
| 1.86E+09 | 2.3103  | -4.21305 |
| 1.87E+09 | 2.06921 | -3.89569 |
| 1.87E+09 | 1.86438 | -3.60401 |
| 1.88E+09 | 1.68907 | -3.33566 |
| 1.88E+09 | 1.538   | -3.08838 |
| 1.89E+09 | 1.40698 | -2.86008 |
| 1.89E+09 | 1.29268 | -2.64885 |
| 1.90E+09 | 1.19241 | -2.45299 |
| 1.90E+09 | 1.104   | -2.27098 |
| 1.91E+09 | 1.02567 | -2.10146 |

|          |          |          |
|----------|----------|----------|
| 1.91E+09 | 0.955958 | -1.94323 |
| 1.92E+09 | 0.893662 | -1.79523 |
| 1.92E+09 | 0.837775 | -1.65649 |
| 1.93E+09 | 0.787454 | -1.5262  |
| 1.93E+09 | 0.74199  | -1.40358 |
| 1.94E+09 | 0.700782 | -1.28798 |
| 1.94E+09 | 0.663319 | -1.1788  |
| 1.95E+09 | 0.629164 | -1.07551 |
| 1.95E+09 | 0.597943 | -0.97762 |
| 1.96E+09 | 0.569331 | -0.8847  |
| 1.96E+09 | 0.543049 | -0.79638 |
| 1.97E+09 | 0.518853 | -0.71229 |
| 1.97E+09 | 0.496531 | -0.63212 |
| 1.98E+09 | 0.475898 | -0.55558 |
| 1.98E+09 | 0.45679  | -0.48242 |
| 1.99E+09 | 0.439065 | -0.4124  |
| 1.99E+09 | 0.422594 | -0.34529 |
| 2.00E+09 | 0.407268 | -0.28091 |
| 2.00E+09 | 0.392986 | -0.21906 |
| 2.01E+09 | 0.367213 | -0.10234 |
| 2.02E+09 | 0.344683 | 0.006054 |
| 2.03E+09 | 0.324929 | 0.107123 |
| 2.04E+09 | 0.307586 | 0.201733 |
| 2.05E+09 | 0.292375 | 0.290636 |
| 2.06E+09 | 0.279103 | 0.374491 |
| 2.07E+09 | 0.26766  | 0.453879 |
| 2.08E+09 | 0.258042 | 0.529306 |
| 2.09E+09 | 0.25039  | 0.601191 |
| 2.10E+09 | 0.245053 | 0.6698   |
| 2.11E+09 | 0.242681 | 0.73504  |
| 2.12E+09 | 0.244173 | 0.79594  |
| 2.13E+09 | 0.249781 | 0.849715 |
| 2.14E+09 | 0.255926 | 0.89209  |
| 2.15E+09 | 0.25327  | 0.924168 |
| 2.16E+09 | 0.238281 | 0.957395 |
| 2.17E+09 | 0.219477 | 0.998572 |
| 2.18E+09 | 0.203512 | 1.04469  |
| 2.19E+09 | 0.191352 | 1.09183  |
| 2.20E+09 | 0.182086 | 1.13813  |
| 2.21E+09 | 0.174789 | 1.18296  |
| 2.22E+09 | 0.168827 | 1.22621  |
| 2.23E+09 | 0.163799 | 1.26793  |
| 2.24E+09 | 0.159455 | 1.30824  |
| 2.25E+09 | 0.15563  | 1.34725  |
| 2.26E+09 | 0.152214 | 1.38508  |
| 2.27E+09 | 0.149131 | 1.42181  |
| 2.28E+09 | 0.146327 | 1.45754  |

|          |          |         |
|----------|----------|---------|
| 2.29E+09 | 0.143761 | 1.49234 |
| 2.30E+09 | 0.141403 | 1.52628 |
| 2.31E+09 | 0.139227 | 1.55942 |
| 2.32E+09 | 0.137215 | 1.59182 |
| 2.33E+09 | 0.13535  | 1.62353 |
| 2.34E+09 | 0.133621 | 1.65459 |
| 2.35E+09 | 0.132017 | 1.68505 |
| 2.36E+09 | 0.13053  | 1.71494 |
| 2.37E+09 | 0.129153 | 1.7443  |
| 2.38E+09 | 0.12788  | 1.77316 |
| 2.39E+09 | 0.12671  | 1.80157 |
| 2.40E+09 | 0.125639 | 1.82954 |
| 2.41E+09 | 0.124669 | 1.85711 |
| 2.42E+09 | 0.123802 | 1.88431 |
| 2.43E+09 | 0.123047 | 1.91115 |
| 2.44E+09 | 0.122413 | 1.93768 |
| 2.45E+09 | 0.121919 | 1.96391 |
| 2.46E+09 | 0.121595 | 1.98987 |
| 2.47E+09 | 0.121482 | 2.01558 |
| 2.48E+09 | 0.121645 | 2.04103 |
| 2.49E+09 | 0.122178 | 2.0662  |
| 2.50E+09 | 0.123206 | 2.09099 |
| 2.51E+09 | 0.124861 | 2.11518 |
| 2.52E+09 | 0.127157 | 2.13833 |
| 2.53E+09 | 0.129689 | 2.15979 |
| 2.54E+09 | 0.131327 | 2.17931 |
| 2.55E+09 | 0.130812 | 2.19782 |
| 2.56E+09 | 0.128218 | 2.21705 |
| 2.57E+09 | 0.124837 | 2.23784 |
| 2.58E+09 | 0.121725 | 2.25983 |
| 2.59E+09 | 0.119232 | 2.28242 |
| 2.60E+09 | 0.117328 | 2.30519 |
| 2.61E+09 | 0.115885 | 2.32792 |
| 2.62E+09 | 0.114779 | 2.35052 |
| 2.63E+09 | 0.113921 | 2.37296 |
| 2.64E+09 | 0.113244 | 2.39522 |
| 2.65E+09 | 0.112706 | 2.41733 |
| 2.66E+09 | 0.112275 | 2.43928 |
| 2.67E+09 | 0.111929 | 2.46109 |
| 2.68E+09 | 0.111655 | 2.48277 |
| 2.69E+09 | 0.111439 | 2.50434 |
| 2.70E+09 | 0.111276 | 2.52581 |
| 2.71E+09 | 0.111158 | 2.54718 |
| 2.72E+09 | 0.111081 | 2.56847 |
| 2.73E+09 | 0.111043 | 2.58969 |
| 2.74E+09 | 0.11104  | 2.61084 |
| 2.75E+09 | 0.111071 | 2.63193 |



|          |          |         |
|----------|----------|---------|
| 2.76E+09 | 0.111135 | 2.65298 |
| 2.77E+09 | 0.111231 | 2.67399 |
| 2.78E+09 | 0.111358 | 2.69497 |
| 2.79E+09 | 0.111516 | 2.71593 |
| 2.80E+09 | 0.111706 | 2.73687 |
| 2.81E+09 | 0.111928 | 2.7578  |
| 2.82E+09 | 0.112181 | 2.77874 |
| 2.83E+09 | 0.112468 | 2.79968 |
| 2.84E+09 | 0.112788 | 2.82064 |
| 2.85E+09 | 0.113144 | 2.84162 |
| 2.86E+09 | 0.113537 | 2.86264 |
| 2.87E+09 | 0.113969 | 2.88371 |
| 2.88E+09 | 0.114441 | 2.90482 |
| 2.89E+09 | 0.114957 | 2.926   |
| 2.90E+09 | 0.115519 | 2.94725 |
| 2.91E+09 | 0.116131 | 2.96859 |
| 2.92E+09 | 0.116796 | 2.99002 |
| 2.93E+09 | 0.117519 | 3.01155 |
| 2.94E+09 | 0.118305 | 3.03321 |
| 2.95E+09 | 0.11916  | 3.05501 |
| 2.96E+09 | 0.120091 | 3.07696 |
| 2.97E+09 | 0.121106 | 3.09907 |
| 2.98E+09 | 0.122215 | 3.12137 |
| 2.99E+09 | 0.12343  | 3.14388 |
| 3.00E+09 | 0.124762 | 3.16662 |
| 3.01E+09 | 0.12623  | 3.18961 |
| 3.02E+09 | 0.127851 | 3.21288 |
| 3.03E+09 | 0.129651 | 3.23647 |
| 3.04E+09 | 0.131658 | 3.2604  |
| 3.05E+09 | 0.133907 | 3.28471 |
| 3.06E+09 | 0.136444 | 3.30945 |
| 3.07E+09 | 0.139326 | 3.33466 |
| 3.08E+09 | 0.142625 | 3.3604  |
| 3.09E+09 | 0.146435 | 3.38672 |
| 3.10E+09 | 0.150878 | 3.41368 |
| 3.11E+09 | 0.156117 | 3.44133 |
| 3.12E+09 | 0.162367 | 3.46973 |
| 3.13E+09 | 0.169919 | 3.49891 |
| 3.14E+09 | 0.179166 | 3.52883 |
| 3.15E+09 | 0.190628 | 3.55934 |
| 3.16E+09 | 0.204978 | 3.59008 |
| 3.17E+09 | 0.223009 | 3.62027 |
| 3.18E+09 | 0.245464 | 3.64844 |
| 3.19E+09 | 0.272504 | 3.67213 |
| 3.20E+09 | 0.302603 | 3.68793 |
| 3.21E+09 | 0.33116  | 3.69293 |
| 3.22E+09 | 0.350797 | 3.68804 |

|          |          |         |
|----------|----------|---------|
| 3.23E+09 | 0.355722 | 3.68026 |
| 3.24E+09 | 0.346961 | 3.6792  |
| 3.25E+09 | 0.331324 | 3.69043 |
| 3.26E+09 | 0.315767 | 3.7138  |
| 3.27E+09 | 0.304283 | 3.74642 |
| 3.28E+09 | 0.2983   | 3.78542 |
| 3.29E+09 | 0.298006 | 3.82886 |
| 3.30E+09 | 0.303277 | 3.87572 |
| 3.31E+09 | 0.314112 | 3.92557 |
| 3.32E+09 | 0.330822 | 3.97836 |
| 3.33E+09 | 0.354133 | 4.03424 |
| 3.34E+09 | 0.385283 | 4.09338 |
| 3.35E+09 | 0.426163 | 4.15589 |
| 3.36E+09 | 0.479518 | 4.22152 |
| 3.37E+09 | 0.549216 | 4.28929 |
| 3.38E+09 | 0.640342 | 4.35672 |
| 3.39E+09 | 0.759983 | 4.41856 |
| 3.40E+09 | 0.915762 | 4.46413 |
| 3.41E+09 | 1.11311  | 4.47402 |
| 3.42E+09 | 1.34707  | 4.41751 |
| 3.43E+09 | 1.58743  | 4.25833 |
| 3.44E+09 | 1.76797  | 3.98111 |
| 3.45E+09 | 1.81196  | 3.63025 |
| 3.46E+09 | 1.69722  | 3.30356 |
| 3.47E+09 | 1.47942  | 3.0797  |
| 3.48E+09 | 1.23667  | 2.97123 |
| 3.49E+09 | 1.01811  | 2.94833 |
| 3.50E+09 | 0.839926 | 2.97584 |
| 3.51E+09 | 0.700795 | 3.02857 |
| 3.52E+09 | 0.593688 | 3.09173 |
| 3.53E+09 | 0.511205 | 3.15751 |
| 3.54E+09 | 0.447211 | 3.22209 |
| 3.55E+09 | 0.397034 | 3.2838  |
| 3.56E+09 | 0.357232 | 3.34202 |
| 3.57E+09 | 0.32529  | 3.39671 |
| 3.58E+09 | 0.299371 | 3.44805 |
| 3.59E+09 | 0.278121 | 3.49632 |
| 3.60E+09 | 0.260531 | 3.54186 |
| 3.61E+09 | 0.245846 | 3.58495 |
| 3.62E+09 | 0.233491 | 3.62589 |
| 3.63E+09 | 0.223022 | 3.66493 |
| 3.64E+09 | 0.214097 | 3.70229 |
| 3.65E+09 | 0.206445 | 3.73818 |
| 3.66E+09 | 0.199855 | 3.77276 |
| 3.67E+09 | 0.194154 | 3.80619 |
| 3.68E+09 | 0.189206 | 3.83859 |
| 3.69E+09 | 0.184899 | 3.87009 |

|          |          |         |
|----------|----------|---------|
| 3.70E+09 | 0.18114  | 3.90079 |
| 3.71E+09 | 0.177854 | 3.93076 |
| 3.72E+09 | 0.17498  | 3.9601  |
| 3.73E+09 | 0.172464 | 3.98886 |
| 3.74E+09 | 0.170263 | 4.01712 |
| 3.75E+09 | 0.168339 | 4.04492 |
| 3.76E+09 | 0.166661 | 4.07232 |
| 3.77E+09 | 0.165203 | 4.09935 |
| 3.78E+09 | 0.163941 | 4.12606 |
| 3.79E+09 | 0.162856 | 4.15248 |
| 3.80E+09 | 0.161931 | 4.17865 |
| 3.81E+09 | 0.161151 | 4.20458 |
| 3.82E+09 | 0.160504 | 4.23032 |
| 3.83E+09 | 0.159978 | 4.25588 |
| 3.84E+09 | 0.159564 | 4.28129 |
| 3.85E+09 | 0.159253 | 4.30657 |
| 3.86E+09 | 0.159039 | 4.33173 |
| 3.87E+09 | 0.158914 | 4.3568  |
| 3.88E+09 | 0.158874 | 4.38179 |
| 3.89E+09 | 0.158913 | 4.40672 |
| 3.90E+09 | 0.159028 | 4.43159 |
| 3.91E+09 | 0.159214 | 4.45643 |
| 3.92E+09 | 0.159469 | 4.48125 |
| 3.93E+09 | 0.15979  | 4.50606 |
| 3.94E+09 | 0.160175 | 4.53088 |
| 3.95E+09 | 0.160622 | 4.55571 |
| 3.96E+09 | 0.161131 | 4.58056 |
| 3.97E+09 | 0.161699 | 4.60546 |
| 3.98E+09 | 0.162326 | 4.6304  |
| 3.99E+09 | 0.163013 | 4.6554  |
| 4.00E+09 | 0.163759 | 4.68047 |
| 4.01E+09 | 0.164566 | 4.70562 |
| 4.02E+09 | 0.165435 | 4.73086 |
| 4.03E+09 | 0.166367 | 4.7562  |
| 4.04E+09 | 0.167365 | 4.78166 |
| 4.05E+09 | 0.168433 | 4.80724 |
| 4.06E+09 | 0.169575 | 4.83295 |
| 4.07E+09 | 0.170796 | 4.85881 |
| 4.08E+09 | 0.172104 | 4.88484 |
| 4.09E+09 | 0.173508 | 4.91103 |
| 4.10E+09 | 0.175019 | 4.93742 |
| 4.11E+09 | 0.176653 | 4.964   |
| 4.12E+09 | 0.17843  | 4.9908  |
| 4.13E+09 | 0.180374 | 5.01783 |
| 4.14E+09 | 0.18252  | 5.0451  |
| 4.15E+09 | 0.184912 | 5.07263 |
| 4.16E+09 | 0.187608 | 5.10041 |

|          |          |         |
|----------|----------|---------|
| 4.17E+09 | 0.190686 | 5.12843 |
| 4.18E+09 | 0.194244 | 5.15666 |
| 4.19E+09 | 0.198406 | 5.18502 |
| 4.20E+09 | 0.203308 | 5.21334 |
| 4.21E+09 | 0.209068 | 5.24136 |
| 4.22E+09 | 0.215698 | 5.26863 |
| 4.23E+09 | 0.222941 | 5.29457 |
| 4.24E+09 | 0.230074 | 5.31864 |
| 4.25E+09 | 0.235897 | 5.34081 |
| 4.26E+09 | 0.239237 | 5.36194 |
| 4.27E+09 | 0.239748 | 5.3836  |
| 4.28E+09 | 0.238166 | 5.40713 |
| 4.29E+09 | 0.235694 | 5.43301 |
| 4.30E+09 | 0.233303 | 5.461   |
| 4.31E+09 | 0.231501 | 5.49061 |
| 4.32E+09 | 0.23045  | 5.52137 |
| 4.33E+09 | 0.230133 | 5.55295 |
| 4.34E+09 | 0.230462 | 5.58513 |
| 4.35E+09 | 0.231343 | 5.6178  |
| 4.36E+09 | 0.232687 | 5.65089 |
| 4.37E+09 | 0.234426 | 5.68438 |
| 4.38E+09 | 0.236505 | 5.71826 |
| 4.39E+09 | 0.238884 | 5.75255 |
| 4.40E+09 | 0.241534 | 5.78724 |
| 4.41E+09 | 0.244433 | 5.82237 |
| 4.42E+09 | 0.247567 | 5.85795 |
| 4.43E+09 | 0.250926 | 5.89401 |
| 4.44E+09 | 0.254507 | 5.93057 |
| 4.45E+09 | 0.258307 | 5.96766 |
| 4.46E+09 | 0.262327 | 6.0053  |
| 4.47E+09 | 0.266571 | 6.04354 |
| 4.48E+09 | 0.271044 | 6.08238 |
| 4.49E+09 | 0.275755 | 6.12187 |
| 4.50E+09 | 0.280711 | 6.16204 |
| 4.51E+09 | 0.285925 | 6.20293 |
| 4.52E+09 | 0.291409 | 6.24456 |
| 4.53E+09 | 0.297176 | 6.28697 |
| 4.54E+09 | 0.303244 | 6.33021 |
| 4.55E+09 | 0.309629 | 6.37431 |
| 4.56E+09 | 0.316352 | 6.41932 |
| 4.57E+09 | 0.323434 | 6.46528 |
| 4.58E+09 | 0.330899 | 6.51225 |
| 4.59E+09 | 0.338774 | 6.56028 |
| 4.60E+09 | 0.347088 | 6.60941 |
| 4.61E+09 | 0.355872 | 6.65972 |
| 4.62E+09 | 0.365163 | 6.71127 |
| 4.63E+09 | 0.374999 | 6.76412 |

|          |          |         |
|----------|----------|---------|
| 4.64E+09 | 0.385422 | 6.81834 |
| 4.65E+09 | 0.396481 | 6.87402 |
| 4.66E+09 | 0.408228 | 6.93124 |
| 4.67E+09 | 0.420721 | 6.99008 |
| 4.68E+09 | 0.434025 | 7.05065 |
| 4.69E+09 | 0.448211 | 7.11305 |
| 4.70E+09 | 0.463361 | 7.17739 |
| 4.71E+09 | 0.479564 | 7.24379 |
| 4.72E+09 | 0.49692  | 7.31239 |
| 4.73E+09 | 0.515542 | 7.38333 |
| 4.74E+09 | 0.535558 | 7.45677 |
| 4.75E+09 | 0.557112 | 7.53287 |
| 4.76E+09 | 0.580364 | 7.61182 |
| 4.77E+09 | 0.605502 | 7.69381 |
| 4.78E+09 | 0.632733 | 7.77907 |
| 4.79E+09 | 0.6623   | 7.86783 |
| 4.80E+09 | 0.694476 | 7.96035 |
| 4.81E+09 | 0.72958  | 8.05692 |
| 4.82E+09 | 0.767976 | 8.15784 |
| 4.83E+09 | 0.810089 | 8.26345 |
| 4.84E+09 | 0.856412 | 8.37411 |
| 4.85E+09 | 0.907521 | 8.49024 |
| 4.86E+09 | 0.964092 | 8.61226 |
| 4.87E+09 | 1.02692  | 8.74065 |
| 4.88E+09 | 1.09695  | 8.87591 |
| 4.89E+09 | 1.1753   | 9.01857 |
| 4.90E+09 | 1.2633   | 9.16921 |
| 4.91E+09 | 1.36257  | 9.32841 |
| 4.92E+09 | 1.47503  | 9.49676 |
| 4.93E+09 | 1.60303  | 9.6748  |
| 4.94E+09 | 1.74942  | 9.86302 |
| 4.95E+09 | 1.91766  | 10.0617 |
| 4.96E+09 | 2.11201  | 10.271  |
| 4.97E+09 | 2.33767  | 10.4904 |
| 4.98E+09 | 2.60102  | 10.7188 |
| 4.99E+09 | 2.90982  | 10.9539 |
| 5.00E+09 | 3.27346  | 11.1915 |
| 5.02E+09 | 3.94656  | 11.5368 |
| 5.03E+09 | 4.81235  | 11.8288 |
| 5.05E+09 | 5.91488  | 11.9875 |
| 5.06E+09 | 7.27348  | 11.8759 |
| 5.08E+09 | 8.825    | 11.2944 |
| 5.09E+09 | 10.3364  | 10.0392 |
| 5.11E+09 | 11.377   | 8.0804  |
| 5.12E+09 | 11.5215  | 5.75752 |
| 5.14E+09 | 10.7117  | 3.6652  |
| 5.15E+09 | 9.3137   | 2.23056 |

|          |         |          |
|----------|---------|----------|
| 5.17E+09 | 7.78355 | 1.50134  |
| 5.18E+09 | 6.40384 | 1.29775  |
| 5.20E+09 | 5.27122 | 1.41281  |
| 5.21E+09 | 4.38134 | 1.69556  |
| 5.23E+09 | 3.69477 | 2.05478  |
| 5.24E+09 | 3.16824 | 2.44078  |
| 5.26E+09 | 2.76519 | 2.82845  |
| 5.27E+09 | 2.45774 | 3.20628  |
| 5.29E+09 | 2.22594 | 3.56972  |
| 5.30E+09 | 2.05649 | 3.91714  |
| 5.32E+09 | 1.94144 | 4.24636  |
| 5.33E+09 | 1.87498 | 4.55021  |
| 5.35E+09 | 1.84209 | 4.81441  |
| 5.36E+09 | 1.80475 | 5.03972  |
| 5.38E+09 | 1.74205 | 5.27173  |
| 5.39E+09 | 1.68736 | 5.54164  |
| 5.41E+09 | 1.6674  | 5.83749  |
| 5.42E+09 | 1.68492 | 6.1455   |
| 5.44E+09 | 1.73737 | 6.46158  |
| 5.45E+09 | 1.82437 | 6.78659  |
| 5.47E+09 | 1.94868 | 7.12305  |
| 5.48E+09 | 2.11614 | 7.47376  |
| 5.50E+09 | 2.33597 | 7.84112  |
| 5.51E+09 | 2.6215  | 8.22627  |
| 5.53E+09 | 2.99142 | 8.62782  |
| 5.54E+09 | 3.47135 | 9.0393   |
| 5.56E+09 | 4.09553 | 9.44449  |
| 5.57E+09 | 4.90732 | 9.80902  |
| 5.59E+09 | 5.95501 | 10.0662  |
| 5.60E+09 | 7.27459 | 10.0971  |
| 5.62E+09 | 8.84425 | 9.71402  |
| 5.63E+09 | 10.4997 | 8.68588  |
| 5.65E+09 | 11.858  | 6.87437  |
| 5.66E+09 | 12.4154 | 4.46895  |
| 5.68E+09 | 11.9105 | 2.04036  |
| 5.69E+09 | 10.5774 | 0.17364  |
| 5.71E+09 | 8.91557 | -0.91648 |
| 5.72E+09 | 7.31965 | -1.35438 |
| 5.74E+09 | 5.9653  | -1.36945 |
| 5.75E+09 | 4.8806  | -1.15268 |
| 5.77E+09 | 4.03182 | -0.82676 |
| 5.78E+09 | 3.37102 | -0.46112 |
| 5.80E+09 | 2.85439 | -0.09208 |
| 5.81E+09 | 2.44694 | 0.262743 |
| 5.83E+09 | 2.12213 | 0.59579  |
| 5.84E+09 | 1.86029 | 0.904697 |
| 5.86E+09 | 1.64684 | 1.18969  |

|          |          |         |
|----------|----------|---------|
| 5.87E+09 | 1.471    | 1.45219 |
| 5.89E+09 | 1.32468  | 1.69411 |
| 5.90E+09 | 1.20182  | 1.91747 |
| 5.92E+09 | 1.09778  | 2.12422 |
| 5.93E+09 | 1.00899  | 2.31617 |
| 5.95E+09 | 0.932692 | 2.49494 |
| 5.96E+09 | 0.866701 | 2.66196 |
| 5.98E+09 | 0.8093   | 2.81853 |
| 5.99E+09 | 0.759115 | 2.96576 |
| 6.01E+09 | 0.71504  | 3.10465 |
| 6.02E+09 | 0.676178 | 3.23605 |
| 6.04E+09 | 0.641797 | 3.36075 |
| 6.05E+09 | 0.611297 | 3.47941 |
| 6.07E+09 | 0.584186 | 3.59264 |
| 6.08E+09 | 0.560056 | 3.70097 |
| 6.10E+09 | 0.538569 | 3.80488 |
| 6.11E+09 | 0.51945  | 3.90481 |
| 6.13E+09 | 0.502471 | 4.00113 |
| 6.14E+09 | 0.48745  | 4.0942  |
| 6.16E+09 | 0.474242 | 4.18435 |
| 6.17E+09 | 0.462738 | 4.27187 |
| 6.19E+09 | 0.452863 | 4.35703 |
| 6.20E+09 | 0.444577 | 4.44008 |
| 6.22E+09 | 0.437874 | 4.52126 |
| 6.23E+09 | 0.432785 | 4.60079 |
| 6.25E+09 | 0.429387 | 4.67887 |
| 6.26E+09 | 0.427808 | 4.75568 |
| 6.28E+09 | 0.42824  | 4.83138 |
| 6.29E+09 | 0.430951 | 4.90607 |
| 6.31E+09 | 0.436308 | 4.97983 |
| 6.32E+09 | 0.444796 | 5.0526  |
| 6.34E+09 | 0.457036 | 5.12416 |
| 6.35E+09 | 0.473799 | 5.19405 |
| 6.37E+09 | 0.495958 | 5.26135 |
| 6.38E+09 | 0.524357 | 5.32448 |
| 6.40E+09 | 0.559445 | 5.38094 |
| 6.41E+09 | 0.600564 | 5.42718 |
| 6.43E+09 | 0.644827 | 5.45907 |
| 6.44E+09 | 0.686098 | 5.47348 |
| 6.46E+09 | 0.715538 | 5.47127 |
| 6.47E+09 | 0.725174 | 5.45942 |
| 6.49E+09 | 0.712884 | 5.44921 |
| 6.50E+09 | 0.683881 | 5.45047 |
| 6.52E+09 | 0.646953 | 5.46725 |
| 6.53E+09 | 0.609662 | 5.49829 |
| 6.55E+09 | 0.576304 | 5.53994 |
| 6.56E+09 | 0.548419 | 5.58868 |

|          |          |         |
|----------|----------|---------|
| 6.58E+09 | 0.526132 | 5.64205 |
| 6.59E+09 | 0.509215 | 5.6986  |
| 6.61E+09 | 0.497598 | 5.75748 |
| 6.62E+09 | 0.49145  | 5.818   |
| 6.64E+09 | 0.491098 | 5.87944 |
| 6.65E+09 | 0.496957 | 5.941   |
| 6.67E+09 | 0.509521 | 6.00171 |
| 6.68E+09 | 0.529346 | 6.06029 |
| 6.70E+09 | 0.556714 | 6.11456 |
| 6.71E+09 | 0.592244 | 6.16302 |
| 6.73E+09 | 0.63566  | 6.20204 |
| 6.74E+09 | 0.684852 | 6.22718 |
| 6.76E+09 | 0.734863 | 6.23426 |
| 6.77E+09 | 0.7776   | 6.22151 |
| 6.79E+09 | 0.803545 | 6.19212 |
| 6.80E+09 | 0.805696 | 6.15504 |
| 6.82E+09 | 0.783364 | 6.1221  |
| 6.83E+09 | 0.742445 | 6.103   |
| 6.85E+09 | 0.692026 | 6.10208 |
| 6.86E+09 | 0.640474 | 6.1186  |
| 6.88E+09 | 0.59346  | 6.14891 |
| 6.89E+09 | 0.553874 | 6.18855 |
| 6.91E+09 | 0.522522 | 6.23335 |
| 6.92E+09 | 0.498828 | 6.27992 |
| 6.94E+09 | 0.481337 | 6.32578 |
| 6.95E+09 | 0.468121 | 6.36945 |
| 6.97E+09 | 0.45719  | 6.41045 |
| 6.98E+09 | 0.446898 | 6.44916 |
| 7.00E+09 | 0.436219 | 6.48646 |
| 7.01E+09 | 0.424781 | 6.52333 |
| 7.03E+09 | 0.412699 | 6.56057 |
| 7.04E+09 | 0.40034  | 6.59865 |
| 7.06E+09 | 0.388119 | 6.63777 |
| 7.07E+09 | 0.376395 | 6.67793 |
| 7.09E+09 | 0.365423 | 6.71902 |
| 7.10E+09 | 0.355362 | 6.76087 |
| 7.12E+09 | 0.346293 | 6.80332 |
| 7.13E+09 | 0.338245 | 6.84622 |
| 7.15E+09 | 0.33121  | 6.88945 |
| 7.16E+09 | 0.325165 | 6.93293 |
| 7.18E+09 | 0.32008  | 6.97658 |
| 7.19E+09 | 0.315924 | 7.02035 |
| 7.21E+09 | 0.312673 | 7.06422 |
| 7.22E+09 | 0.310312 | 7.10818 |
| 7.24E+09 | 0.308842 | 7.15219 |
| 7.25E+09 | 0.308274 | 7.19628 |
| 7.27E+09 | 0.308639 | 7.24042 |



|          |          |         |
|----------|----------|---------|
| 7.28E+09 | 0.309983 | 7.2846  |
| 7.30E+09 | 0.312363 | 7.3288  |
| 7.31E+09 | 0.315835 | 7.37295 |
| 7.33E+09 | 0.320429 | 7.41697 |
| 7.34E+09 | 0.326116 | 7.4608  |
| 7.36E+09 | 0.332804 | 7.50447 |
| 7.37E+09 | 0.340464 | 7.54824 |
| 7.39E+09 | 0.349392 | 7.59252 |
| 7.40E+09 | 0.360366 | 7.63759 |
| 7.42E+09 | 0.374451 | 7.6832  |
| 7.43E+09 | 0.392662 | 7.72855 |
| 7.45E+09 | 0.415822 | 7.77239 |
| 7.46E+09 | 0.444504 | 7.81299 |
| 7.48E+09 | 0.478792 | 7.84796 |
| 7.49E+09 | 0.517735 | 7.87426 |
| 7.51E+09 | 0.558555 | 7.88865 |
| 7.52E+09 | 0.596112 | 7.88907 |
| 7.54E+09 | 0.623651 | 7.87662 |
| 7.55E+09 | 0.635501 | 7.85674 |
| 7.57E+09 | 0.630275 | 7.83749 |
| 7.58E+09 | 0.611514 | 7.8257  |
| 7.60E+09 | 0.585008 | 7.82425 |
| 7.61E+09 | 0.555538 | 7.8325  |
| 7.63E+09 | 0.525644 | 7.84859 |
| 7.64E+09 | 0.496391 | 7.87107 |
| 7.66E+09 | 0.468539 | 7.89909 |
| 7.67E+09 | 0.442929 | 7.93184 |
| 7.69E+09 | 0.420225 | 7.96828 |
| 7.70E+09 | 0.400691 | 8.00726 |
| 7.72E+09 | 0.38422  | 8.04781 |
| 7.73E+09 | 0.370493 | 8.08916 |
| 7.75E+09 | 0.359115 | 8.13083 |
| 7.76E+09 | 0.349703 | 8.1725  |
| 7.78E+09 | 0.341919 | 8.214   |
| 7.79E+09 | 0.335482 | 8.25521 |
| 7.81E+09 | 0.330163 | 8.2961  |
| 7.82E+09 | 0.325781 | 8.33665 |
| 7.84E+09 | 0.322191 | 8.37684 |
| 7.85E+09 | 0.319279 | 8.4167  |
| 7.87E+09 | 0.316951 | 8.45621 |
| 7.88E+09 | 0.315126 | 8.49537 |
| 7.90E+09 | 0.313722 | 8.53416 |
| 7.91E+09 | 0.31264  | 8.57257 |
| 7.93E+09 | 0.311747 | 8.61056 |
| 7.94E+09 | 0.310859 | 8.64818 |
| 7.96E+09 | 0.309773 | 8.68559 |
| 7.97E+09 | 0.308383 | 8.72312 |

|          |          |         |
|----------|----------|---------|
| 7.99E+09 | 0.306861 | 8.76116 |
| 8.00E+09 | 0.305686 | 8.79993 |
| 8.02E+09 | 0.305384 | 8.83923 |
| 8.03E+09 | 0.306237 | 8.87858 |
| 8.05E+09 | 0.308237 | 8.91747 |
| 8.06E+09 | 0.31118  | 8.95543 |
| 8.08E+09 | 0.314711 | 8.99209 |
| 8.09E+09 | 0.318298 | 9.02716 |
| 8.11E+09 | 0.321215 | 9.06057 |
| 8.12E+09 | 0.322652 | 9.09265 |
| 8.14E+09 | 0.322004 | 9.12419 |
| 8.15E+09 | 0.319186 | 9.15622 |
| 8.17E+09 | 0.314698 | 9.18966 |
| 8.18E+09 | 0.309357 | 9.22493 |
| 8.20E+09 | 0.303931 | 9.26199 |
| 8.21E+09 | 0.298938 | 9.30051 |
| 8.23E+09 | 0.294631 | 9.34012 |
| 8.24E+09 | 0.291077 | 9.38049 |
| 8.26E+09 | 0.288241 | 9.42135 |
| 8.27E+09 | 0.286049 | 9.46256 |
| 8.29E+09 | 0.284419 | 9.50401 |
| 8.30E+09 | 0.283274 | 9.54563 |
| 8.32E+09 | 0.28255  | 9.58739 |
| 8.33E+09 | 0.282198 | 9.62929 |
| 8.35E+09 | 0.282177 | 9.6713  |
| 8.36E+09 | 0.282459 | 9.71344 |
| 8.38E+09 | 0.282937 | 9.75545 |
| 8.39E+09 | 0.28365  | 9.7977  |
| 8.41E+09 | 0.284611 | 9.84018 |
| 8.42E+09 | 0.285835 | 9.88291 |
| 8.44E+09 | 0.287338 | 9.92589 |
| 8.45E+09 | 0.289137 | 9.96911 |
| 8.47E+09 | 0.291253 | 10.0126 |
| 8.48E+09 | 0.293708 | 10.0563 |
| 8.50E+09 | 0.296529 | 10.1003 |
| 8.51E+09 | 0.299747 | 10.1445 |
| 8.53E+09 | 0.303402 | 10.1889 |
| 8.54E+09 | 0.307538 | 10.2336 |
| 8.56E+09 | 0.312216 | 10.2786 |
| 8.57E+09 | 0.317506 | 10.3237 |
| 8.59E+09 | 0.323502 | 10.3691 |
| 8.60E+09 | 0.330313 | 10.4145 |
| 8.62E+09 | 0.338077 | 10.46   |
| 8.63E+09 | 0.346946 | 10.5054 |
| 8.65E+09 | 0.357082 | 10.5505 |
| 8.66E+09 | 0.368623 | 10.5949 |
| 8.68E+09 | 0.381631 | 10.6381 |

|          |          |         |
|----------|----------|---------|
| 8.69E+09 | 0.395989 | 10.6795 |
| 8.71E+09 | 0.411279 | 10.7183 |
| 8.72E+09 | 0.426645 | 10.7538 |
| 8.74E+09 | 0.440756 | 10.7858 |
| 8.75E+09 | 0.451997 | 10.8144 |
| 8.77E+09 | 0.458929 | 10.841  |
| 8.78E+09 | 0.460858 | 10.8673 |
| 8.80E+09 | 0.458117 | 10.8955 |
| 8.81E+09 | 0.451884 | 10.9269 |
| 8.83E+09 | 0.443666 | 10.9622 |
| 8.84E+09 | 0.434831 | 11.0013 |
| 8.86E+09 | 0.426369 | 11.0437 |
| 8.87E+09 | 0.418873 | 11.0889 |
| 8.89E+09 | 0.412634 | 11.1363 |
| 8.90E+09 | 0.407742 | 11.1853 |
| 8.92E+09 | 0.404183 | 11.2356 |
| 8.93E+09 | 0.401895 | 11.287  |
| 8.95E+09 | 0.4008   | 11.3392 |
| 8.96E+09 | 0.40083  | 11.3921 |
| 8.98E+09 | 0.401931 | 11.4456 |
| 8.99E+09 | 0.404069 | 11.4997 |
| 9.01E+09 | 0.407232 | 11.5542 |
| 9.02E+09 | 0.411422 | 11.6091 |
| 9.04E+09 | 0.41666  | 11.6644 |
| 9.05E+09 | 0.422964 | 11.7199 |
| 9.07E+09 | 0.430342 | 11.7754 |
| 9.08E+09 | 0.438759 | 11.8308 |
| 9.10E+09 | 0.448105 | 11.8859 |
| 9.11E+09 | 0.458146 | 11.9404 |
| 9.13E+09 | 0.4685   | 11.9941 |
| 9.14E+09 | 0.47865  | 12.047  |
| 9.16E+09 | 0.488047 | 12.0995 |
| 9.17E+09 | 0.496279 | 12.1521 |
| 9.19E+09 | 0.503246 | 12.2056 |
| 9.20E+09 | 0.509218 | 12.2606 |
| 9.22E+09 | 0.514749 | 12.3178 |
| 9.23E+09 | 0.520495 | 12.3773 |
| 9.25E+09 | 0.527066 | 12.4392 |
| 9.26E+09 | 0.534945 | 12.5032 |
| 9.28E+09 | 0.54449  | 12.5692 |
| 9.29E+09 | 0.555959 | 12.6368 |
| 9.31E+09 | 0.569558 | 12.7059 |
| 9.32E+09 | 0.585461 | 12.7762 |
| 9.34E+09 | 0.603837 | 12.8476 |
| 9.35E+09 | 0.62485  | 12.9199 |
| 9.37E+09 | 0.648662 | 12.9927 |
| 9.38E+09 | 0.675431 | 13.066  |

|          |          |         |
|----------|----------|---------|
| 9.40E+09 | 0.705313 | 13.1393 |
| 9.41E+09 | 0.738474 | 13.2125 |
| 9.43E+09 | 0.775102 | 13.2852 |
| 9.44E+09 | 0.815415 | 13.357  |
| 9.46E+09 | 0.859652 | 13.4273 |
| 9.47E+09 | 0.908022 | 13.4955 |
| 9.49E+09 | 0.960612 | 13.5605 |
| 9.50E+09 | 1.01724  | 13.621  |
| 9.52E+09 | 1.07726  | 13.6756 |
| 9.53E+09 | 1.13936  | 13.7227 |
| 9.55E+09 | 1.20137  | 13.761  |
| 9.56E+09 | 1.26028  | 13.7898 |
| 9.58E+09 | 1.3125   | 13.8098 |
| 9.59E+09 | 1.3545   | 13.8233 |
| 9.61E+09 | 1.38373  | 13.8343 |
| 9.62E+09 | 1.39948  | 13.8477 |
| 9.64E+09 | 1.40321  | 13.8684 |
| 9.65E+09 | 1.39824  | 13.9001 |
| 9.67E+09 | 1.38885  | 13.945  |
| 9.68E+09 | 1.37931  | 14.003  |
| 9.70E+09 | 1.37307  | 14.0729 |
| 9.71E+09 | 1.37243  | 14.1526 |
| 9.73E+09 | 1.37849  | 14.2399 |
| 9.74E+09 | 1.39136  | 14.333  |
| 9.76E+09 | 1.41054  | 14.4308 |
| 9.77E+09 | 1.43541  | 14.533  |
| 9.79E+09 | 1.46574  | 14.6402 |
| 9.80E+09 | 1.50198  | 14.7533 |
| 9.82E+09 | 1.5453   | 14.8733 |
| 9.83E+09 | 1.59746  | 15.0006 |
| 9.85E+09 | 1.66052  | 15.1353 |
| 9.86E+09 | 1.73673  | 15.2773 |
| 9.88E+09 | 1.82849  | 15.4258 |
| 9.89E+09 | 1.93834  | 15.5799 |
| 9.91E+09 | 2.06913  | 15.7385 |
| 9.92E+09 | 2.22409  | 15.8999 |
| 9.94E+09 | 2.40693  | 16.0616 |
| 9.95E+09 | 2.62191  | 16.2205 |
| 9.97E+09 | 2.87374  | 16.3716 |
| 9.98E+09 | 3.16743  | 16.5083 |
| 1.00E+10 | 3.50775  | 16.621  |
| 1.00E+10 | 3.63224  | 16.6511 |
